# Supplementary material for: Pentanuclear clusters resembling the cubane-dangler connectivity in the native oxygen-evolving center of photosystem II
Source: Royal Society of Chemistry journal article supplement (doi:10.1039/d0cc07050e), 2020-11-23
Supplement: d0cc07050e1.pdf [file d0cc07050e1.pdf]

## Supporting Information

### Pentanuclear Clusters Resembling the Cubane-Dangler Connectivity in Native Oxygen-Evolving Center of Photosystem II

Chao Yang, Shenyu Wang, Fusheng Sai, Dingqi Liu, Fuxing Sun, Yu Gu and Gang Wu\*

#### Experimental section

##### Materials and methods

All chemicals were obtained commercially without further purification. *Caution! Although no such sign was observed during the present work, perchlorate salts are potentially explosive and should be handled with care and in small quantities.*

Elemental analysis (C, H and N) was carried out using a Perkin-Elmer 2400 Elemental Analyzer. ICP-AES analyses were performed on a PerkinElmer OPTIMA 3300DV ICP spectrometer. Electrospray mass spectrometry (ESI-MS) measurements were carried out in the positive ion mode using an Orbitrap Fusion™ Tribrid™ mass spectrometer (Thermo Scientific, San Jose, CA, USA) that was equipped with an electrospray ionization (ESI) source. Mass spectra were collected in the mass range  $m/z$  200-2000. The heated ion capillary was maintained at 320 °C. The electrochemical measurements were conducted on a Bio-Logic VSP electrochemical workstation. Cyclic voltammograms were recorded on ca. 1 mM solutions of the relevant complexes at 25 °C with a platinum wire counter electrode, a Ag/Ag<sup>+</sup> reference electrode (0.01 M AgNO<sub>3</sub>, 0.1 M nBu<sub>4</sub>NPF<sub>6</sub> in CH<sub>3</sub>CN), and a 3.0 mm glassy carbon electrode disc. The electrolyte solutions were 0.1 M nBu<sub>4</sub>NPF<sub>6</sub> in CH<sub>2</sub>Cl<sub>2</sub>:DMF (20:1) for all compounds. All reported values are referenced to an internal ferrocene/ferrocenium couple.

Single-crystal X-ray diffraction measurements for compound 1 and 3 were carried out using a Bruker D8 QUEST system with Mo-K $\alpha$  radiation ( $\lambda = 0.71073$  Å) at 150 K. Data of compound 4 were collected on a MarCCD mx300 in the National Center for Protein Sciences Shanghai at the Shanghai Synchrotron Radiation Facility at 100 K. The diffraction data of compound 4 were transformed by APEX3 (The file type of the diffraction pictures was changed from name.mccd to name.sfrm). The raw data collection and reduction were done using APEX3 software.<sup>1</sup> Absorption corrections were applied using SADABS. The structures were solved by direct methods and refined by full-matrix least-squares techniques based on F2 using the SHELXS-2014 program.<sup>2</sup> All the non-hydrogen atoms were refined with anisotropic parameters. Program SQUEEZE, a part of the PLATON package of crystallographic software, was used to calculate the solvent disorder area and remove its contribution to the overall intensity data.<sup>3</sup>

## Synthesis

2-(hydroxy(bipyridin-2-yl)methyl)phenol (H<sub>2</sub>L) was synthesized according to the literature.<sup>4</sup>

### Preparation of [Fe<sup>III</sup><sub>3</sub>Zn<sup>II</sup><sub>2</sub>L<sub>3</sub>O(OAc)<sub>3</sub>(CH<sub>3</sub>OH)](ClO<sub>4</sub>)<sub>2</sub>·(CH<sub>3</sub>OH)<sub>1.5</sub> (compound 1)

A solution of Fe(ClO<sub>4</sub>)<sub>3</sub>·xH<sub>2</sub>O (105mg, 0.3mmol) in CH<sub>3</sub>OH (5mL) was added with stirring to a solution of Zn(OAc)<sub>2</sub>·2H<sub>2</sub>O (74mg, 0.3mmol) and H<sub>2</sub>L (28mg, 0.2mmol) in CH<sub>3</sub>OH (10mL), followed by addition of Et<sub>3</sub>N (15 μL). After stirring for 2 h, the resulting dark-red solution was filtered and the filtrate was left undisturbed to slowly evaporate. After 4 days, black orthohexagonal crystals were obtained in ca. 22% yield (based on Fe). Elemental analysis (%) Calcd for [Fe<sup>III</sup><sub>3</sub>Mn<sup>II</sup><sub>2</sub>L<sub>3</sub>O(OAc)<sub>3</sub>(CH<sub>3</sub>OH)(ClO<sub>4</sub>)<sub>2</sub>]·(CH<sub>3</sub>OH)<sub>1.5</sub> (C<sub>59.5</sub>H<sub>55</sub>N<sub>6</sub>O<sub>23.5</sub>Cl<sub>2</sub>Fe<sub>3</sub>Zn<sub>2</sub>) : C 44.68, H 3.44, N 5.23, Fe 10.51, Zn 8.14; found: C 45.96, H 3.57, N 5.19, Fe 10.22, Zn 8.09.

### Preparation of compound 2

A solution of Fe(ClO<sub>4</sub>)<sub>3</sub>·xH<sub>2</sub>O (70mg, 0.2mmol) in CH<sub>3</sub>OH (5mL) was added with stirring to a solution of Co(OAc)<sub>2</sub> (74mg, 0.3mmol) and H<sub>2</sub>L (28mg, 0.2mmol) in CH<sub>3</sub>OH (5mL), followed by addition of Et<sub>3</sub>N (15 μL). After stirring for 2 h, the resulting dark-red solution was filtered and the filtrate was left undisturbed to slowly evaporate. After 4 days, black orthohexagonal crystals were obtained in ca. 13% yield (based on Fe). Elemental analysis (%) found for compound 2: C 45.32, H 3.88, N 5.03, Fe 10.32, Co 7.39.

### Preparation of [Fe<sup>III</sup><sub>3</sub>Mn<sup>II</sup><sub>2</sub>L<sub>3</sub>O(OAc)<sub>3</sub>(CH<sub>3</sub>OH)](ClO<sub>4</sub>)<sub>2</sub>·(CH<sub>3</sub>OH)<sub>1.5</sub> (compound 3)

A solution of Fe(ClO<sub>4</sub>)<sub>3</sub>·xH<sub>2</sub>O (70mg, 0.2mmol) in CH<sub>3</sub>OH (5mL) was added with stirring to a solution of Mn(OAc)<sub>2</sub>·4H<sub>2</sub>O (74mg, 0.3mmol) and H<sub>2</sub>L (28mg, 0.1mmol) in CH<sub>3</sub>OH (5mL), followed by addition of Et<sub>3</sub>N (20 μL). After stirring for 2 h, the resulting dark-red solution was filtered and the filtrate was left undisturbed to slowly evaporate. After 4 days, black orthohexagonal crystals were obtained in ca. 27% yield (based on Fe). Elemental analysis (%) Calcd for [Fe<sup>III</sup><sub>3</sub>Mn<sup>II</sup><sub>2</sub>L<sub>3</sub>O(OAc)<sub>3</sub>(CH<sub>3</sub>OH)(ClO<sub>4</sub>)<sub>2</sub>]·(CH<sub>3</sub>OH)<sub>1.5</sub> (C<sub>59.5</sub>H<sub>55</sub>N<sub>6</sub>O<sub>23.5</sub>Cl<sub>2</sub>Fe<sub>3</sub>Mn<sub>2</sub>) : C 45.25, H 3.49, N 5.32, Fe 10.65, Mn 6.97; found: C 46.03, H 3.65, N 5.22, Fe 10.43, Mn 6.82.

### Preparation of [Fe<sup>III</sup><sub>3</sub>Ni<sup>II</sup><sub>2</sub>L<sub>3</sub>O(OAc)<sub>2</sub>(OCH<sub>3</sub>)(CH<sub>3</sub>OH)(H<sub>2</sub>O)](ClO<sub>4</sub>)<sub>2</sub> (compound 4)

A solution of Fe(ClO<sub>4</sub>)<sub>3</sub>·xH<sub>2</sub>O (70mg, 0.2mmol) in CH<sub>3</sub>OH (5mL) was added with stirring to a solution of Ni(OAc)<sub>2</sub>·4H<sub>2</sub>O (74mg, 0.3mmol) and H<sub>2</sub>L (28mg, 0.2mmol) in CH<sub>3</sub>OH (5mL), followed by addition of Et<sub>3</sub>N (15 μL). After stirring for 2 h, the resulting deep red solution was filtered and the filtrate was left undisturbed to slowly evaporate. After a week, dark red block crystals were obtained in ca. 9% yield (based on Fe). Elemental analysis (%) Calcd for Fe<sup>III</sup><sub>3</sub>Ni<sup>II</sup><sub>2</sub>L<sub>3</sub>O(OAc)<sub>2</sub>(OCH<sub>3</sub>)(CH<sub>3</sub>OH)(H<sub>2</sub>O)(ClO<sub>4</sub>)<sub>2</sub> (C<sub>57</sub>H<sub>48</sub>Cl<sub>2</sub>Fe<sub>3</sub>N<sub>6</sub>Ni<sub>2</sub>O<sub>22</sub>) : C 44.85, H 3.15, N 5.51, Fe 11.02, Ni 7.74; found: C 46.18, H 3.83, N 5.01, Fe 10.53, Ni 7.55.

Scheme S1. Synthetic route of H<sub>2</sub>L.

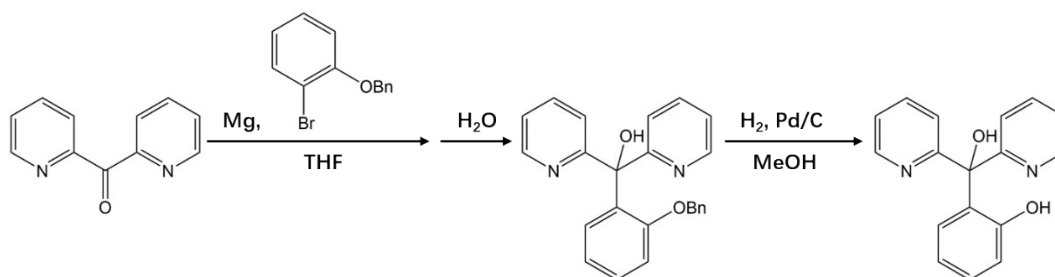

**Table S1** Crystallographic data for **1**, **3** and **4**

| compound                                    | 1                                                                                                                 | 3                                                                                                                 | 4                                                                                                              |
|---------------------------------------------|-------------------------------------------------------------------------------------------------------------------|-------------------------------------------------------------------------------------------------------------------|----------------------------------------------------------------------------------------------------------------|
| Empirical formula                           | C <sub>119</sub> H <sub>110</sub> Cl <sub>4</sub> Fe <sub>6</sub> N <sub>12</sub> O <sub>47</sub> Zn <sub>4</sub> | C <sub>119</sub> H <sub>110</sub> Cl <sub>4</sub> Fe <sub>6</sub> Mn <sub>4</sub> N <sub>12</sub> O <sub>47</sub> | C <sub>57</sub> H <sub>48</sub> Cl <sub>2</sub> Fe <sub>3</sub> N <sub>6</sub> Ni <sub>2</sub> O <sub>22</sub> |
| Formula weight                              | 3198.56                                                                                                           | 3156.84                                                                                                           | 1524.88                                                                                                        |
| Temperature/K                               | 150.(2)                                                                                                           | 150.(2)                                                                                                           | 273(2)                                                                                                         |
| Crystal system                              | trigonal                                                                                                          | trigonal                                                                                                          | triclinic                                                                                                      |
| Space group                                 | R $\bar{3}$                                                                                                       | R $\bar{3}$                                                                                                       | p $\bar{1}$                                                                                                    |
| a/Å                                         | 13.0721(3)                                                                                                        | 13.1328(3)                                                                                                        | 14.1061(10)                                                                                                    |
| b/Å                                         | 13.0721(3)                                                                                                        | 13.1328(3)                                                                                                        | 14.4531(9)                                                                                                     |
| c/Å                                         | 63.6995(19)                                                                                                       | 63.2624(19)                                                                                                       | 17.9914(12)                                                                                                    |
| $\alpha$ /°                                 | 90                                                                                                                | 90                                                                                                                | 79.977(2)                                                                                                      |
| $\beta$ /°                                  | 90                                                                                                                | 90                                                                                                                | 68.320(2)                                                                                                      |
| $\gamma$ /°                                 | 120                                                                                                               | 120                                                                                                               | 72.495(2)                                                                                                      |
| Volume/Å <sup>3</sup>                       | 9426.6(5)                                                                                                         | 9449.1(5)                                                                                                         | 3242.5(4)                                                                                                      |
| Z                                           | 3                                                                                                                 | 3                                                                                                                 | 2                                                                                                              |
| $\rho_{\text{calc}}/\text{g}/\text{cm}^3$   | 1.690                                                                                                             | 1.664                                                                                                             | 1.562                                                                                                          |
| $\mu/\text{mm}^{-1}$                        | 1.601                                                                                                             | 1.236                                                                                                             | 1.387                                                                                                          |
| F(000)                                      | 4884.0                                                                                                            | 4824.0                                                                                                            | 1552.0                                                                                                         |
| Crystal size/mm <sup>3</sup>                | 0.140 × 0.130 × 0.130                                                                                             | 0.140 × 0.120 × 0.110                                                                                             | 0.140 × 0.120 × 0.110                                                                                          |
| Radiation                                   | MoK $\alpha$ ( $\lambda$ = 0.71073)                                                                               | MoK $\alpha$ ( $\lambda$ = 0.71073)                                                                               | MoK $\alpha$ ( $\lambda$ = 0.71073)                                                                            |
| 2 $\theta$ range for data collection/°      | 4.82 to 50.08                                                                                                     | 4.82 to 50.16                                                                                                     | 2.442 to 56.546                                                                                                |
| Index ranges                                | -12 ≤ h ≤ 11, -15 ≤ k ≤ 15, -42 ≤ l ≤ 75                                                                          | -10 ≤ h ≤ 9, -15 ≤ k ≤ 15, -75 ≤ l ≤ 37                                                                           | -17 ≤ h ≤ 17, -19 ≤ k ≤ 19, -23 ≤ l ≤ 23                                                                       |
| Reflections collected                       | 10641                                                                                                             | 10528                                                                                                             | 45714                                                                                                          |
| Independent reflections                     | 3702 [R <sub>int</sub> = 0.0315, R <sub>sigma</sub> = 0.0393]                                                     | 3721 [R <sub>int</sub> = 0.0270, R <sub>sigma</sub> = 0.0344]                                                     | 12537 [R <sub>int</sub> = 0.0827, R <sub>sigma</sub> = 0.0498]                                                 |
| Data/restraints/parameters                  | 3702/13/317                                                                                                       | 3721/14/311                                                                                                       | 12537/276/804                                                                                                  |
| Goodness-of-fit on F <sup>2</sup>           | 1.031                                                                                                             | 1.081                                                                                                             | 1.039                                                                                                          |
| Final R indexes [I ≥ 2 $\sigma$ (I)]        | R <sub>1</sub> = 0.0406, wR <sub>2</sub> = 0.0957                                                                 | R <sub>1</sub> = 0.0526, wR <sub>2</sub> = 0.1300                                                                 | R <sub>1</sub> = 0.0969, wR <sub>2</sub> = 0.2467                                                              |
| Final R indexes [all data]                  | R <sub>1</sub> = 0.0530, wR <sub>2</sub> = 0.1016                                                                 | R <sub>1</sub> = 0.0689, wR <sub>2</sub> = 0.1388                                                                 | R <sub>1</sub> = 0.1184, wR <sub>2</sub> = 0.2709                                                              |
| Largest diff. peak/hole / e Å <sup>-3</sup> | 1.00/-1.45                                                                                                        | 1.80/-0.77                                                                                                        | 1.87/-2.85                                                                                                     |

**Table S2** Fe-O/Fe-N and Ni-O/Ni-N bond distance (Å) and calculated Fe/Ni valences<sup>5</sup> for compound **4**

| Bond                             | Length/Å  | Bond    | Length/Å  | Bond    | Length/Å  | Bond    | Length/Å  | Bond    | Length/Å  |
|----------------------------------|-----------|---------|-----------|---------|-----------|---------|-----------|---------|-----------|
| Fe1-O2                           | 1.851(5)  | Fe2-O4  | 1.894(5)  | Fe3-O12 | 1.895(5)  | Ni1-O5  | 2.026(4)  | Ni2-O1  | 2.021(5)  |
| Fe1-O7                           | 1.988(5)  | Fe2-O6  | 1.965(6)  | Fe3-O10 | 1.982(7)  | Ni1-N3  | 2.059(5)  | Ni2-O9  | 2.030(5)  |
| Fe1-O12                          | 2.012(5)  | Fe2-O11 | 1.993(6)  | Fe3-O11 | 1.986(6)  | Ni1-N5  | 2.085(6)  | Ni2-N6  | 2.051(6)  |
| Fe1-O3                           | 2.048(5)  | Fe2-O12 | 2.054(5)  | Fe3-O8  | 1.996(6)  | Ni1-N1  | 2.090(6)  | Ni2-O12 | 2.085(4)  |
| Fe1-O1                           | 2.080(4)  | Fe2-O5  | 2.116(5)  | Fe3-O13 | 2.076(7)  | Ni1-O1  | 2.112(4)  | Ni2-N2  | 2.114(5)  |
| Fe1-N4                           | 2.187(6)  | Fe2-O3  | 2.232(5)  | Fe3-O14 | 2.106(6)  | Ni1-O3  | 2.126(5)  | Ni2-O5  | 2.147(4)  |
| Average                          | 2.028     | Average | 2.032     | Average | 2.007     | Average | 2.083     | Average | 2.075     |
| <b>Calculated Fe/Ni valences</b> |           |         |           |         |           |         |           |         |           |
| Fe1                              | +3(0.074) | Fe2     | +3(0.090) | Fe3     | +3(0.124) | Ni1     | +2(0.070) | Ni2     | +2(0.100) |

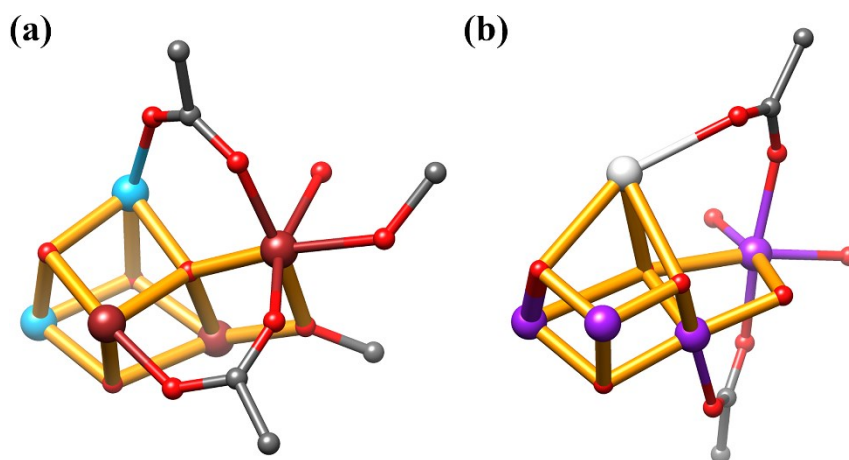

**Figure S1.** “Cubane-plus-dangler” structures of compound **4** (a) and the native OEC (b), highlighting the coordination environment of the dangling ions and their connectivity with the parent cubane core. (Fe: dark red; Ni: light blue; Ca: light gray; Mn: purple; C: dim gray; O: red)

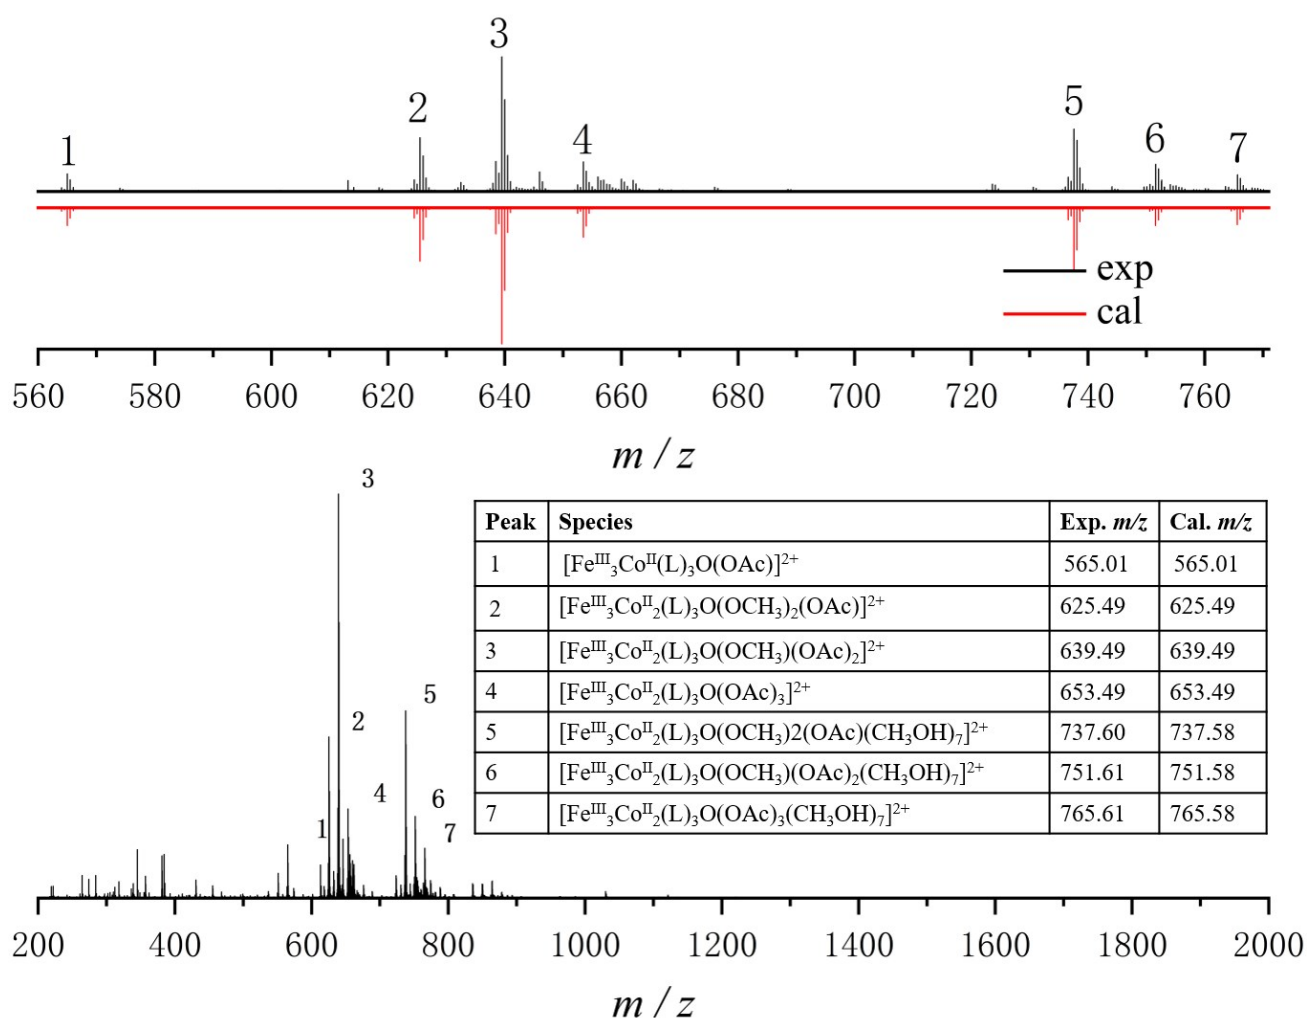

**Figure S2.** ESI-MS of compound **2** in DCM/DMF (20:1). Charge states are indicated as  $2^+$ . Experimental (black) and simulated (red) mass spectra of the isotopic envelopes are exhibited. The formulas of each species are given in the table.

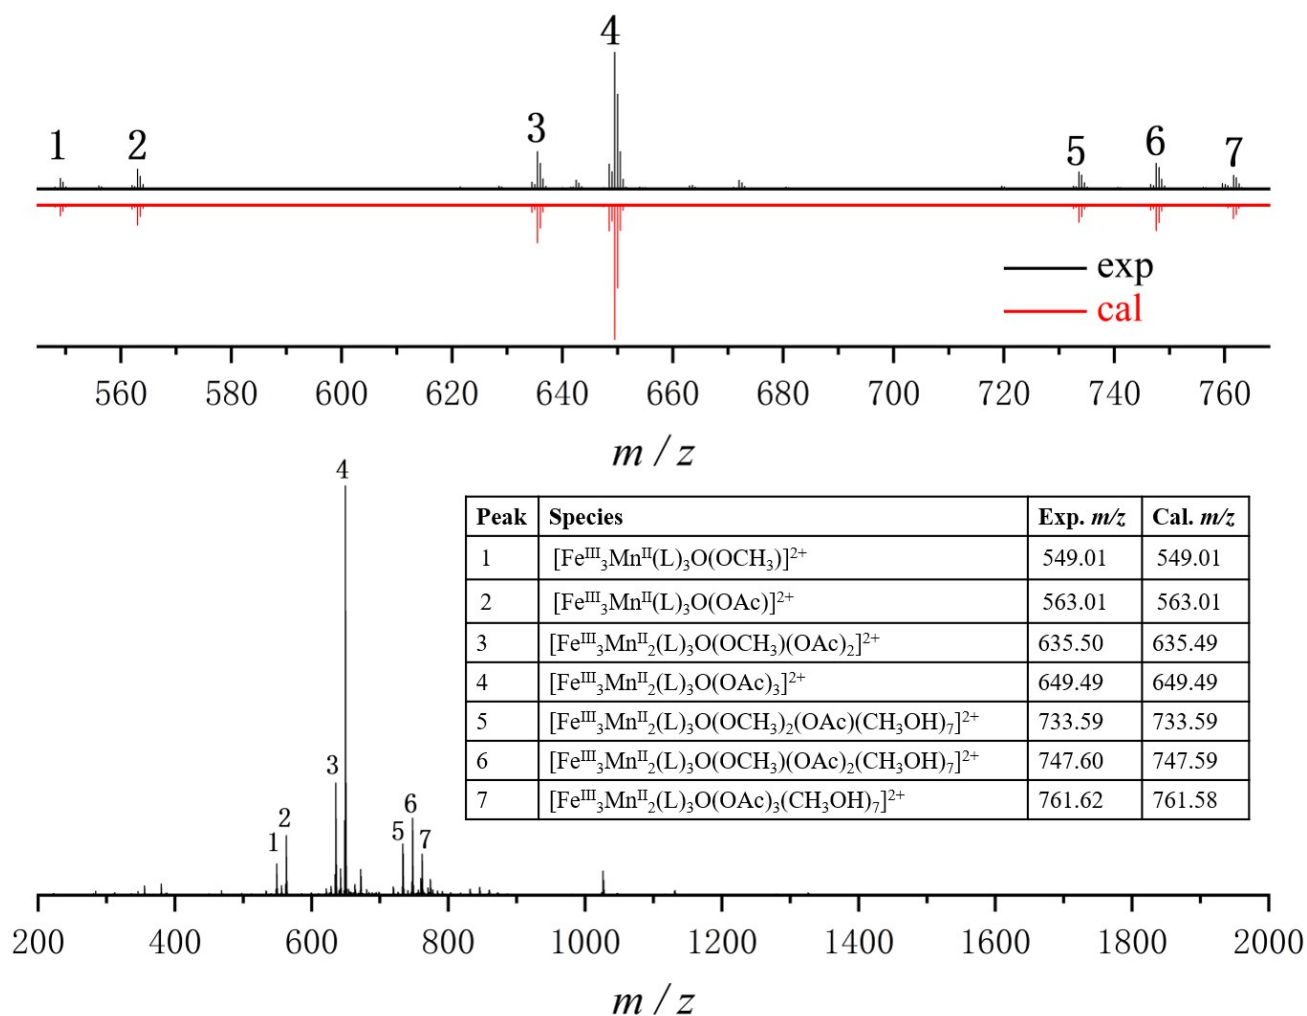

**Figure S3.** ESI-MS of compound **3** in DCM/DMF (20:1). Charge states are indicated as  $2^+$ . Experimental (black) and simulated (red) mass spectra of the isotopic envelopes are exhibited. The formulas of each species are given in the table.

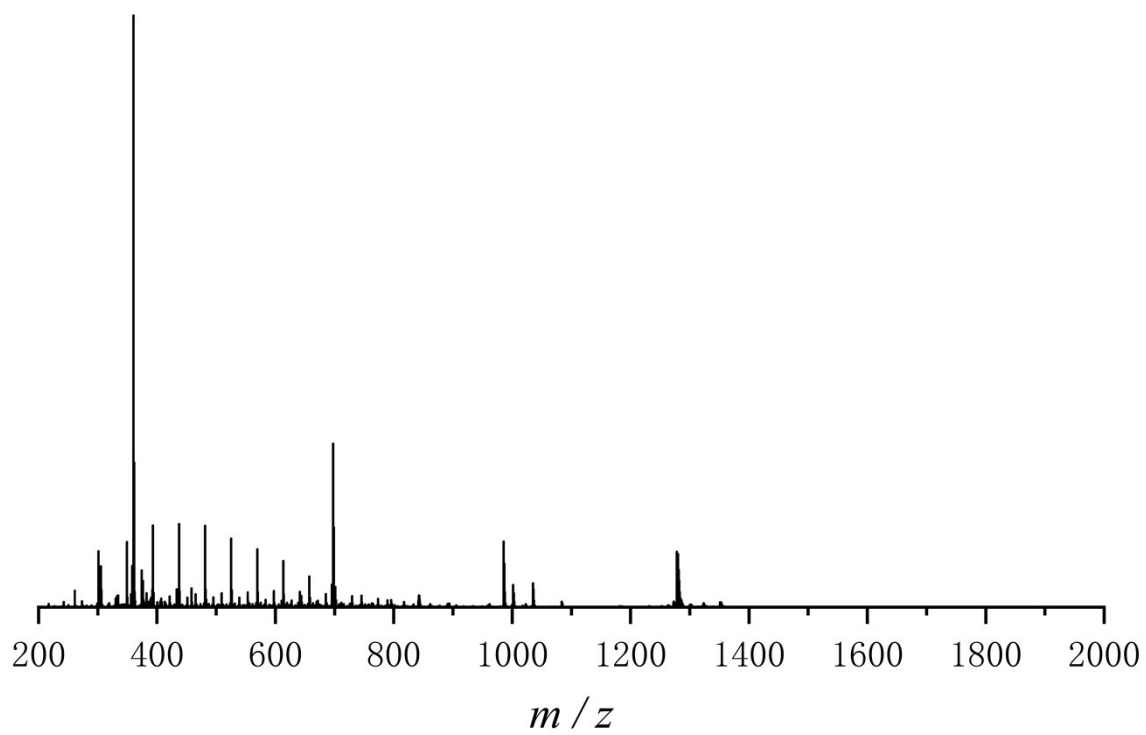

**Figure S4.** ESI-MS of compound **4** dissolved in DCM/DMF (20:1).

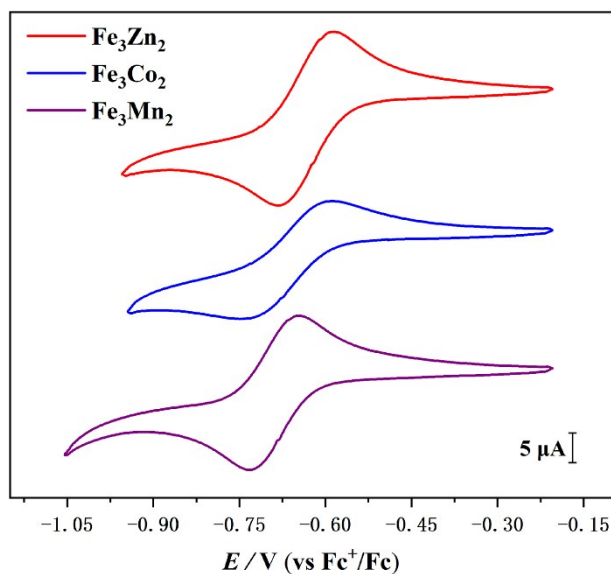

**Fig. S5** Cyclic voltammograms corresponding to the  $[\text{Fe}^{\text{III}}_3\text{M}^{\text{II}}_2]/[\text{Fe}^{\text{III}}_2\text{Fe}^{\text{II}}\text{M}^{\text{II}}_2]$  redox couple ( $\text{M}^{\text{II}} = \text{Zn}^{\text{II}}, \text{Co}^{\text{II}}, \text{and Mn}^{\text{II}}$ ) in DCM/DMF (20:1). Scan rate is 100 mV/s. Potentials are referenced to  $\text{Fc}^+/\text{Fc}$ .

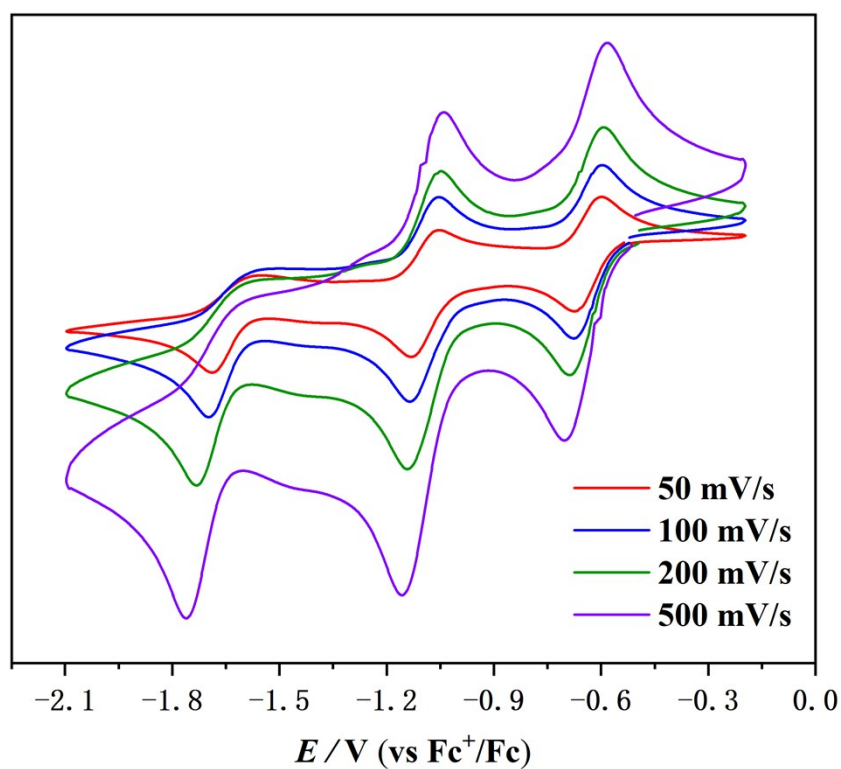

**Figure S6.** Cyclic voltammograms with varying scan rates of compound **1** ( $\text{Fe}_3\text{Zn}_2$ ).



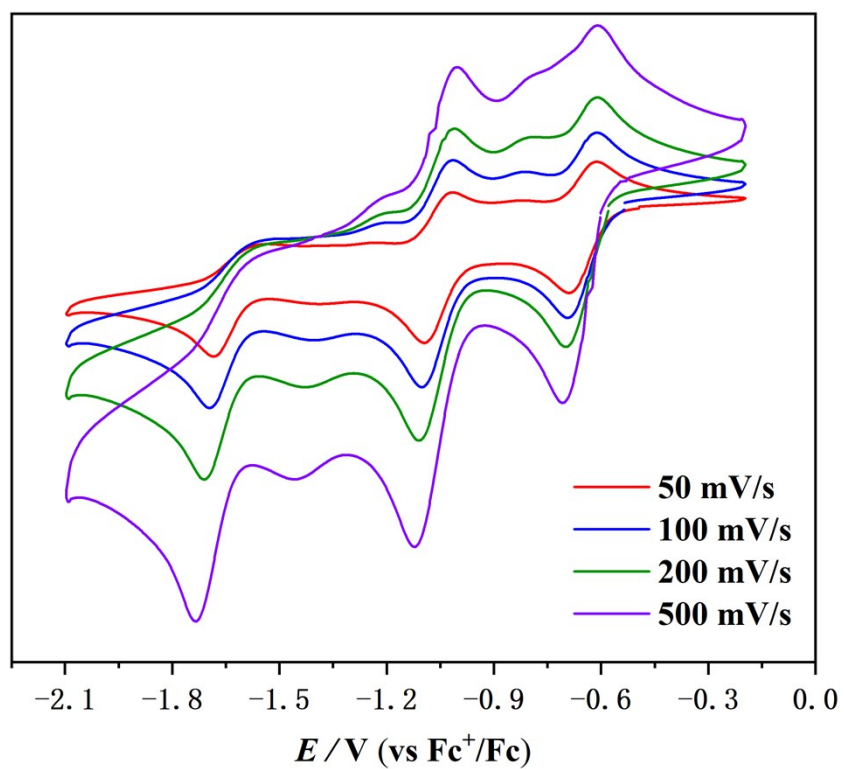

**Figure S7.** Cyclic voltammograms with varying scan rates of compound 2 ( $\text{Fe}_3\text{Co}_2$ ).

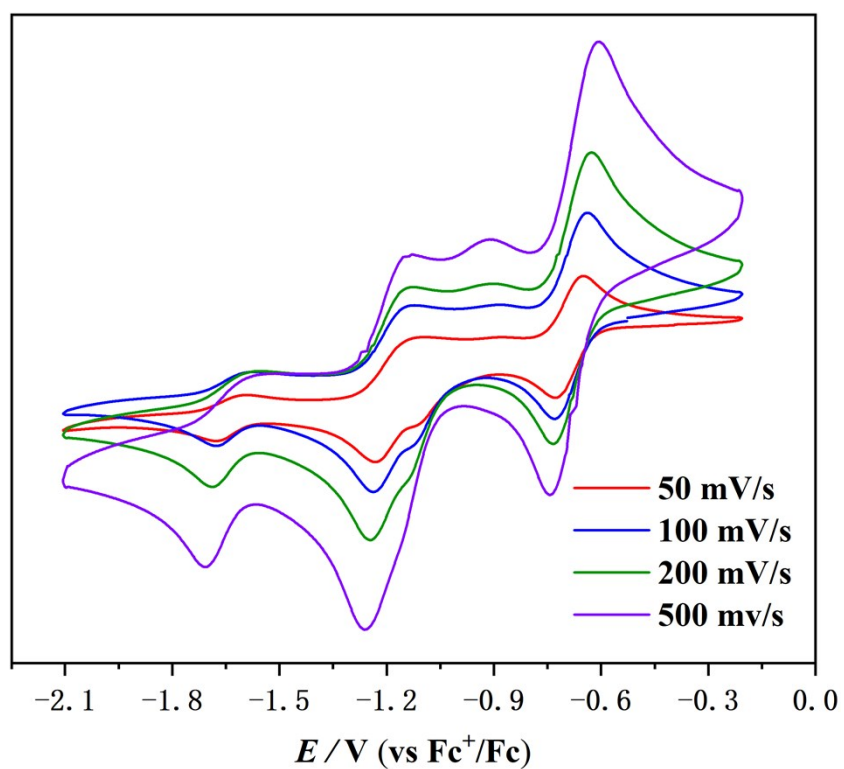

**Figure S8.** Cyclic voltammograms with varying scan rates of compound 3 ( $\text{Fe}_3\text{Mn}_2$ ).

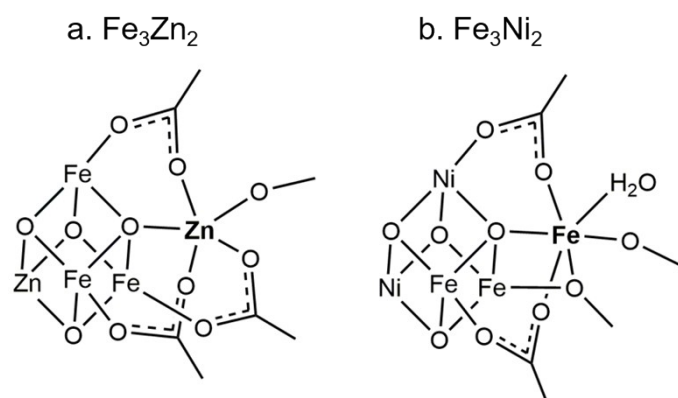

**Figure S9.** ChemDraws for compound **1** (a) and compound **4** (b). (Ligands are omitted for clarity.)

## References

1. C. H. Görbitz, *Acta Crystallographica Section B: Structural Science*, 1999, **55**, 1090-1098.
2. G. Sheldrick, *Acta Crystallogr., Sect. A: Found. Adv.*, 2015, **71**, 3-8.
3. A. Spek, *Acta Crystallogr., Sect. C: Struct. Chem.*, 2015, **71**, 9-18.
4. Y. Zhang, C. Yang, F. Sun, G. Wu and S. Qiu, *Inorg. Chem. Commun.*, 2019, **106**, 6-10.
5. I. D. Brown, *The Chemical Bond in Inorganic Chemistry*, Oxford University Press, Oxford, 2002.
